# Supplementary material for: Acute flaccid myelitis: long-term outcomes recorded in the CAPTURE study compared with paediatric transverse myelitis
Source: HighWire-hosted journal article supplement (doi:10.1136/bmjno-2021-000127), 2021-05-01
Supplement: bmjno-2021-000127supp001_data_supplement.pdf [file bmjno-2021-000127supp001_data_supplement.pdf]

- 1 *eTable 1 Demographic results by cohort, diagnosis within cohort, and total patient population; values followed by “n=” denoted the number of*
- 2 *non-missing data values.*
- 3 *eTable 2 Clinical and laboratory results by cohort, diagnosis within cohort, and total patient population; values followed by “n=” denote the*
- 4 *number of non-missing data values.*
- 5 *eTable 3 Clinician-derived outcomes at 6 months and 12 months post-onset. For each measurement, “n=” denotes the number of patients in the*
- 6 *sample with data recorded.*
- 7 *eTable 4 PROMIS Parent Proxy scores at 6 months and 12 months post-onset. For each measurement, “n=” denotes the number of patients in the*
- 8 *sample with data recorded.*
- 9 *eTable 5 PROMIS Pediatric scores at 6 months and 12 months post-onset. For each measurement, “n=” denotes the number of patients in the*
- 10 *sample with data recorded.*

11 *eTable 1. Demographic results by cohort, diagnosis within cohort, and total patient population; values followed by “n=” denoted the number of*  
 12 *non-missing data values.*

|                                     | In-Person Cohort  |                  |                  | Virtual Cohort            |                           |                           | Total                     |
|-------------------------------------|-------------------|------------------|------------------|---------------------------|---------------------------|---------------------------|---------------------------|
|                                     | TM                | AFM              | Total            | TM                        | AFM                       | Total                     |                           |
| n                                   | 26                | 34               | 60               | 13                        | 17                        | 30                        | 90                        |
| Female                              | 12 (46%)          | 10 (29%)         | 22 (37%)         | 7 (54%)                   | 7 (41%)                   | 14 (47%)                  | 36 (40%)                  |
| Age at Onset                        |                   |                  |                  |                           |                           |                           |                           |
| Median (range)                      | 11.0 (0.3 – 17.9) | 4.5 (0.9 – 13.5) | 5.3 (0.3 – 17.9) | 4.7 (0.3 – 12.6),<br>n=12 | 8.6 (0.6 – 14.8),<br>n=15 | 7.1 (0.3 – 14.8),<br>n=27 | 5.5 (0.3 – 17.9),<br>n=87 |
| Race                                |                   |                  |                  |                           |                           |                           |                           |
| Caucasian                           | 21 (81%)          | 23 (68%)         | 44 (73%)         | 13 (100%)                 | 14 (82%)                  | 27 (90%)                  | 71 (79%)                  |
| African American                    | 1 (4%)            | 4 (12%)          | 5 (8%)           | 0                         | 0                         | 0                         | 5 (6%)                    |
| Asian                               | 1 (4%)            | 3 (9%)           | 4 (7%)           | 0                         | 1 (6%)                    | 1 (3%)                    | 5 (6%)                    |
| More Than One<br>Race               | 1 (4%)            | 3 (9%)           | 4 (7%)           | 0                         | 1 (6%)                    | 1 (3%)                    | 5 (6%)                    |
| Preferred Not to<br>Answer          | 2 (8%)            | 1 (3%)           | 3 (5%)           | 0                         | 1 (6%)                    | 1 (3%)                    | 4 (4%)                    |
| Ethnicity                           |                   |                  |                  |                           |                           |                           |                           |
| Hispanic or<br>Latino               | 5 (19%)           | 7 (21%)          | 12 (20%)         | 2 (17%), n=12             | 1 (6%)                    | 3 (10%), n=29             | 15 (17%), n=89            |
| Preferred Not to<br>Answer          | 0                 | 2 (6%)           | 2 (3%)           | 0                         | 0                         | 0                         | 2 (2%), n=89              |
| Illness Within 3<br>Months of Onset | 14 (61%), n=23    | 29 (85%)         | 43 (75%), n=57   | 9 (69%)                   | 11 (73%), n=15            | 20 (71%), n=28            | 63 (74%), n=85            |

TM: Transverse Myelitis; AFM: Acute Flaccid Myelitis; std. dev.: standard deviation

13

14

15 *eTable 2. Clinical and laboratory results by cohort, diagnosis within cohort, and total patient population; values followed by “n=” denote the*  
 16 *number of non-missing data values.*

|                                  | In-Person Cohort     |                      |                      | Virtual Cohort       |                       |                      | Total                |
|----------------------------------|----------------------|----------------------|----------------------|----------------------|-----------------------|----------------------|----------------------|
|                                  | TM                   | AFM                  | Total                | TM                   | AFM                   | Total                |                      |
| n                                | 26                   | 34                   | 60                   | 13                   | 17                    | 30                   | 90                   |
| Symptoms at Onset                |                      |                      |                      |                      |                       |                      |                      |
| Weakness                         |                      |                      |                      |                      |                       |                      |                      |
| Upper Extrem. Only               | 5 (19%)              | 13 (38%)             | 18 (30%)             | 1 (8%)               | 6 (38%), n=16         | 7 (24%), n=29        | 25 (28%), n=89       |
| Lower Extrem. Only               | 14 (54%)             | 9 (26%)              | 23 (38%)             | 9 (69%)              | 8 (50%), n=16         | 17 (59%), n=29       | 40 (45%), n=89       |
| Both Upper and Lower Extrem.     | 6 (23%)              | 10 (29%)             | 16 (27%)             | 3 (23%)              | 2 (13%), n=16         | 5 (17%), n=29        | 21 (24%), n=89       |
| Numbness                         |                      |                      |                      |                      |                       |                      |                      |
| Upper Extrem. Only               | 0                    | 2 (6%)               | 2 (3%)               | 0                    | 1 (6%), n=16          | 1 (3%), n=29         | 3 (3%), n=89         |
| Lower Extrem. Only               | 9 (35%)              | 6 (18%)              | 15 (25%)             | 2 (15%)              | 6 (35%), n=16         | 8 (27%), n=29        | 23 (26%), n=89       |
| Both Upper and Lower Extrem.     | 1 (4%)               | 0                    | 1 (2%)               | 1 (8%)               | 0, n=16               | 1 (3%), n=28         | 2 (2%), n=89         |
| Laboratory Results               |                      |                      |                      |                      |                       |                      |                      |
| CSF WBC (cells/mm <sup>3</sup> ) |                      |                      |                      |                      |                       |                      |                      |
| Median (range)                   | 2 (0-709),<br>n=20   | 13 (0-287),<br>n=28  | 9 (0-709),<br>n=48   | 12 (0-501),<br>n=10  | 35 (1-89),<br>n=15    | 17 (0-501),<br>n=25  | 10 (0-709),<br>n=73  |
| CSF Protein (mg/dL)              |                      |                      |                      |                      |                       |                      |                      |
| Median (range)                   | 47 (23-148),<br>n=20 | 40 (18-596),<br>n=27 | 45 (18-596),<br>n=47 | 48 (20-722),<br>n=10 | 37.5 (28-69),<br>n=14 | 42 (20-722),<br>n=24 | 44 (18-722),<br>n=71 |
| Oligoclonal Bands Present        | 2 (11%), n=18        | 0, n=18              | 2 (6%), n=36         | 0, n=10              | 0, n=11               | 0, n=21              | 2 (4%), n=57         |
| Enterovirus                      |                      |                      |                      |                      |                       |                      |                      |
| Positive                         | 2 (8%)               | 14 (41%)             | 16 (27%)             | 1 (8%)               | 4 (24%), n=16         | 5 (17%), n=29        | 21 (24%), n=89       |
| Not Tested                       | 8 (31%)              | 7 (21%)              | 15 (25%)             | 6 (46%)              | 4 (24%), n=16         | 10 (33%), n=29       | 25 (28%), n=89       |

TM: Transverse Myelitis; AFM: Acute Flaccid Myelitis; std. dev.: standard deviation; CSF: Cerebrospinal Fluid; WBC: White Blood Cells

17  
18  
19  
20

21 *eTable 3. Clinician-derived outcomes at 6 months and 12 months post-onset. For each measurement, "n=" denotes the number of patients in the sample with data recorded.*

|                                             | TM                        | AFM                         | AFM Subtypes                |                        |
|---------------------------------------------|---------------------------|-----------------------------|-----------------------------|------------------------|
|                                             |                           |                             | Grey Matter                 | Mixed Matter           |
| <b>6 Months Post-Onset</b>                  |                           |                             |                             |                        |
| WeeFIM                                      |                           |                             |                             |                        |
| Median Self-Care (range)                    | 9 (6-24), n = 3           | 17.5 (6-42), n = 12         | 26 (14-42), n = 7           | 8 (6-42), n = 4        |
| Median Sphincter Control (range)            | 4 (4-28), n = 3           | 21 (4-28), n = 12           | 28 (4-28), n = 7            | 4 (4-28), n = 4        |
| Median Transfer (range)                     | 3 (3-9), n = 3            | 10 (3-21), n = 12           | 19 (3-21), n = 7            | 3 (3-21), n = 4        |
| Median Locomotion (range)                   | 2 (2-5), n = 3            | 9 (2-14), n = 12            | 10 (3-14), n = 7            | 4 (2-14), n = 4        |
| Median Communication (range)                | 8 (2-14), n = 3           | 10 (2-14), n = 12           | 10 (10-14), n = 7           | 5.5 (2-14), n = 4      |
| Median Social Cognition (range)             | 11 (3-21), n = 3          | 13 (3-21), n = 12           | 15 (10-21), n = 7           | 7.5 (3-21), n = 4      |
| Median Motor Subset (range)                 | 18 (15-66), n = 3         | 52 (15-105), n = 12         | 83 (26-105), n = 7          | 19 (15-105), n = 4     |
| Median Cognitive Subset (range)             | 19 (5-35), n = 3          | 23 (5-35), n = 12           | 25 (20-35), n = 7           | 13 (5-35), n = 4       |
| Median Total (range)                        | 37 (20-101), n = 3        | 73.5 (20-140), n = 12       | 108 (49-140), n = 7         | 32 (20-140), n = 4     |
| Median Hauser Ambulation Index (range)      | 4 (0-9), n = 12           | 5 (0-9), n = 20             | 0 (0-9), n = 10             | 9 (0-9), n = 9         |
| Median 25-Foot Timed Walk (seconds) (range) | 3.7 (3.0-19.7), n = 7     | 4.8 (4.1-9.9), n = 8        | 4.8 (4.1-9.9), n = 6        | 4.9 (4.8, 5.0), n = 2  |
| Median 6-Minute Walk (feet) (range)         | 1890.3 (1195-1902), n = 4 | 1409.6 (0.0-1873.4), n = 10 | 1409.6 (1330-1873.4), n = 6 | 1440.5 (0-1676), n = 4 |
| <b>12 Months Post-Onset</b>                 |                           |                             |                             |                        |
| WeeFIM                                      |                           |                             |                             |                        |
| Median Self-Care (range)                    | 19 (10-35), n = 8         | 20 (6-42), n = 18           | 25 (7-42), n = 10           | 14 (6-42), n = 7       |
| Median Sphincter Control (range)            | 11 (4-28), n = 8          | 19.5 (4-28), n = 18         | 23 (4-28), n = 10           | 4 (4-28), n = 7        |
| Median Transfer (range)                     | 6.5 (3-21), n = 8         | 13.5 (3-21), n = 18         | 16.5 (3-21), n = 10         | 5 (3-17), n = 7        |
| Median Locomotion (range)                   | 6 (4-14), n = 8           | 11.5 (2-14), n = 18         | 12 (5-14), n = 10           | 9 (2-14), n = 7        |
| Median Communication (range)                | 12.5 (3-14), n = 8        | 12 (6-14), n = 18           | 11.5 (7-14), n = 10         | 12 (9-14), n = 7       |
| Median Social Cognition (range)             | 18 (3-21), n = 8          | 17.5 (7-21), n = 18         | 17 (10-21), n = 10          | 18 (12-21), n = 7      |
| Median Motor Subset (range)                 | 45.5 (21-98), n = 8       | 53.5 (15-105), n = 18       | 71 (31-105), n = 10         | 37 (15-105), n = 7     |
| Median Cognitive Subset (range)             | 30 (6-35), n = 8          | 28 (13-35), n = 18          | 28 (17-35), n = 10          | 30 (24-35), n = 7      |
| Median Total (range)                        | 78 (29-130), n = 8        | 78.5 (39-140), n = 18       | 98.5 (54-140), n = 10       | 67 (39-140), n = 7     |
| Median Hauser Ambulation Index (range)      | 2 (0-9), n = 10           | 1.5 (0-9), n = 22           | 0 (0-8), n = 11             | 7 (0-9), n = 8         |
| Median 25-Foot Timed Walk (seconds) (range) | 4.5 (3.7-9.5), n = 5      | 4.9 (3.8-6.8), n = 9        | 4.9 (4.3-6.8), n = 5        | 5.4 (4.2-5.4), n = 3   |
| Median 6-Minute Walk (feet) (range)         | 1641.5 (1148-2135), n = 2 | 1535.6 (500-1771), n = 9    | 1666.5 (1276-1771), n = 6   | 947 (500-1394), n = 2  |

TM: Transverse Myelitis; AFM: Acute Flaccid Myelitis

23 eTable 4. PROMIS Parent Proxy scores at 6 months and 12 months post-onset. For each measurement, "n=" denotes the number of patients in the sample with data recorded.

|                                | TM                   | AFM                  | AFM Subtypes         |                      |
|--------------------------------|----------------------|----------------------|----------------------|----------------------|
|                                |                      |                      | Grey Matter          | Mixed Matter         |
| <b>6 Months Post-Onset</b>     |                      |                      |                      |                      |
| Median Anxiety (range)         | 33 (16-40), n = 15   | 32 (13-40), n = 17   | 32 (25-40), n = 8    | 37 (13-40), n = 8    |
| Median Depression (range)      | 28 (10-30), n = 16   | 24 (16-30), n = 18   | 24 (19-30), n = 8    | 29 (16-30), n = 9    |
| Median Tiredness (range)       | 34.5 (13-50), n = 14 | 40 (24-50), n = 17   | 40 (33-50), n = 7    | 42 (24-50), n = 9    |
| Median Pain (range)            | 35 (10-40), n = 7    | 37 (24-40), n = 9    | 40 (24-40), n = 5    | 35.5 (28-140), n = 4 |
| Median Peer (range)            | 12 (7-35), n = 16    | 9 (7-19), n = 16     | 7 (7-14), n = 8      | 11 (7-19), n = 7     |
| Median Mobility (range)        | 30.5 (10-40), n = 14 | 33 (8-40), n = 14    | 34 (8-40), n = 7     | 24 (8 -38), n = 7    |
| Median Upper Extremity (range) | 38 (19-40), n = 14   | 33.5 (17-40), n = 14 | 26 (17-40), n = 7    | 36 (23-40), n = 7    |
| <b>12 Months Post-Onset</b>    |                      |                      |                      |                      |
| Median Anxiety (range)         | 33 (16-40), n = 15   | 32.5 (13-40), n = 22 | 29.5 (13-38), n = 12 | 36 (22-40), n = 8    |
| Median Depression (range)      | 29 (12-30), n = 13   | 27.5 (16-30), n = 22 | 27.5 (16-30), n = 12 | 29.5 (21-30), n = 8  |
| Median Tiredness (range)       | 37 (12-50), n = 13   | 40 (22-50), n = 20   | 41 (24-50), n = 10   | 43 (22-50), n = 8    |
| Median Pain (range)            | 40 (11-40), n = 9    | 40 (25-40), n = 15   | 40 (32-40), n = 9    | 40 (25-40), n = 5    |
| Median Peer (range)            | 8.5 (7-21), n = 14   | 10.5 (7-19), n = 20  | 13 (7-15), n = 11    | 7 (7-19), n = 7      |
| Median Mobility (range)        | 32 (8-40), n = 14    | 34 (10-40), n = 19   | 34 (10-40), n = 11   | 34 (13-40), n = 7    |
| Median Upper Extremity (range) | 38.5 (17-40), n = 14 | 34.5 (8-40), n = 16  | 32.5 (8-40), n = 8   | 37.5 (29-40), n = 6  |

TM: Transverse Myelitis; AFM: Acute Flaccid Myelitis

24

25 *eTable 5. PROMIS Pediatric scores at 6 months and 12 months post-onset. For each measurement, "n=" denotes the number of*  
 26 *patients in the sample with data recorded.*

|                                | TM                   | AFM                  | AFM Subtypes        |                     |
|--------------------------------|----------------------|----------------------|---------------------|---------------------|
|                                |                      |                      | Grey Matter         | Mixed Matter        |
| <b>6 Months Post-Onset</b>     |                      |                      |                     |                     |
| Median Anxiety (range)         | 11 (8-29), n = 15    | 14 (8-33), n = 13    | 10 (8-25), n = 5    | 14 (8-33), n = 7    |
| Median Depression (range)      | 8 (8-29), n = 15     | 11.5 (8-22), n = 12  | 11 (8-22), n = 4    | 9 (8-22), n = 7     |
| Median Tiredness (range)       | 14 (10-36), n = 13   | 14 (10-36), n = 12   | 12 (10-23), n = 5   | 20 (10-36), n = 7   |
| Median Pain (range)            | 8 (8-34), n = 7      | 8 (8-12), n = 7      | 8 (8-8), n = 3      | 9 (8-12), n = 4     |
| Median Peer (range)            | 31.5 (24-36), n = 12 | 31 (24-36), n = 11   | 31 (30-36), n = 5   | 35 (24-36), n = 5   |
| Median Mobility (range)        | 36 (8-40), n = 12    | 25.5 (10-40), n = 12 | 39 (13-40), n = 5   | 24.5 (10-37), n = 6 |
| Median Upper Extremity (range) | 39 (26-40), n = 15   | 39 (16-40), n = 11   | 40 (37-40), n = 5   | 31.5 (16-40), n = 6 |
| <b>12 Months Post-Onset</b>    |                      |                      |                     |                     |
| Median Anxiety (range)         | 12.5 (8-29), n = 12  | 14 (8-39), n = 12    | 16 (8-39), n = 5    | 12 (8-35), n = 5    |
| Median Depression (range)      | 8 (8-27), n = 13     | 10 (8-26), n = 12    | 8 (8-24), n = 5     | 12 (8-26), n = 5    |
| Median Tiredness (range)       | 13.5 (10-41), n = 12 | 11 (10-42), n = 11   | 10 (10-18), n = 5   | 27 (10-42), n = 4   |
| Median Pain (range)            | 8 (8-28), n = 9      | 9 (8-39), n = 5      | 8 (8-8), n = 1      | 33 (9-39), n = 3    |
| Median Peer (range)            | 36 (8-36), n = 13    | 34 (16-36), n = 11   | 28.5 (16-36), n = 4 | 34 (27-36), n = 5   |
| Median Mobility (range)        | 33.5 (14-40), n = 10 | 37 (10-40), n = 9    | 38.5 (16-40), n = 4 | 25 (10-40), n = 4   |
| Median Upper Extremity (range) | 38 (26-40), n = 12   | 39 (8-40), n = 11    | 39.5 (37-40), n = 4 | 28 (8-40), n = 5    |

TM: Transverse Myelitis; AFM: Acute Flaccid Myelitis

27

28

29

30
